# Supplementary material for: Characterization of Protocatechuate 4,5-Dioxygenase from Pseudarthrobacter phenanthrenivorans Sphe3 and In Situ Reaction Monitoring in the NMR Tube
Source: MDPI journal article supplement (doi:10.3390/ijms22179647), 2021-09-06
Supplement: s1 [file s1]

>PcaA

MTLDKPYNDVPGTTIFDADQARKGYNLNQFCMSLMKPENRERYLADRGAYLDEWPLNPVQRQ  
AVLDIDLNTCIAEGGNIYFLAKIGATHGLSFQQMAGSM  
TGMSEAAAYRDMMIGGGRRPEGNRLKDLDGWTPPEPGEKAETVRQDAPAQYTSALFTSHVPAIG  
AAMD LGKTEEPYWKKVFSGYEWTREWAKE--NLPDVV  
ILVYNDHATAFDSSIPTFVLGTGAEYPVADEGYGPRPVPDVKGYPELAAHIAQSVIQDDFDLTLV  
NEMVVDHGLTVPLSLVYGDVEEWPVRVIPLAVNV  
VQYPVPSGRRCYELGRALRRALDKWDGEPLNVQIWGTGGMSHQLQGPRAGLINEEWDNAFLD  
HLIADPVGLTEWQHMEYVDEAGSEGIELVDWLIARGAM  
DDQFGGESPEVNHRFYHVPASNTAVGHLVLTNQTD

>1B4U

-----  
-----  
ARVTTGITSSHIPALGAAIQTGTSDNDYWGPVFKGYQPIRDWIKQPGNMPDVV  
ILVYNDHASAFDMNIPTFAIGCAETFKPADEGWGPRPVPDVKGHPDLAWHIAQSLILDEFDMTI  
MNQMDVDHGVCTVPLSMIFGEPEEWPCVIPFPVNV  
VTYPPPSGKRCFALGDSIRAAVESFP-  
EDLNVHVWGTGGMSHQLQGPRAGLINKEFDLNFIDKLISDPEELSKMPHIQYLRESGSEGVELVM  
WLIMRGAL  
P-----EKVRDLYTFYHIPASNTALGAMILQPE--

>pcaA

MTLDKPYNDVPGTTIFDADQARKGYNLNQFCMSLMKPENRERYLADRGAYLDEWPLNPVQRQ  
AVLDIDLNTCIAEGGNIYFLAKIGATHGLSFQQMAGSM  
TGMSEAAAYRDMMIGGGRRPEGNRLKDLDGWTPPEPGEKAETVRQDAPAQYTSALFTSHVPAIG  
AAMD LGKTEEPYWKKVFSGYEWTREWAKENLPDVVIL  
VYNDHATAFDSSIPTFVLGTGAEYPVADEGYGPRPVPDVKGYPELAAHIAQSVIQDDFDLTLVN  
EMVVDHGLTVPLSLVYGDVEEWPVRVIPLAVNVVQ  
YPVPSGRRCYELGRALRRALDKWDGEPLNVQIWGTGGMSHQLQGPRAGLINEEWDNAFLDHLI  
ADPVGLTEWQHMEYVDEAGSEGIELVDWLIARGAMDD  
QFGGESPEVNHRFYHVPASNTAVGHLVLTNQTD

>1B4U

-----  
EFDDIPGTRVFTAQRARKGYNLNQFAMSLMKAENRERFKADESAYLDEWNLTAAKAAVLARD  
YNAMIDEGGNVYFLSKLFSTDGKSQFAAGSM  
TGMTQEYYAQMMIDGGRSPAGVR-----  
-----  
-----  
-----

>PcaA

MTLDKPYNDVPGTTIFDADQARKGYNLNQFCMSLMKPENRERYLADRGAYLDEWPLNPVQRQ  
AVLDIDLNTCIAEGGNIYFLAKIGATHGLSFQQMAGSM  
TGMSEAAYRDMMIGGGRRPEGNRLKDLDGWTPPEPGEKAETVRQDAPAQYTSALFTSHVPAIG  
AAMD LGKTEEPYWKKVFSGYEWTREWAKENLPDVVIL  
VYN DHATAFDSSIPTFVLGTGAEYPVADEGYGPRVPDVKGYPELAAHIAQSVIQDDFDLTLVN  
EMVVDHGLTVPLSLVYGDVEEWPVRVIPLAVNVVQ  
YPVP SGRRCYELGRALRRALDKWDGEPLNVQIWGTGGMSHQLQGPRAGLINEEWDNAFLDHLI  
ADPVGLTEWQHMEYVDEAGSEGIELVDWLIARGAMDD  
QFGGESPEVNHRFYHVPASNTAVGHLVLTNQTD  
>3WRB

-----  
-----  
AKIIGGFAVSHPTIAFAHDANKYDDPVWAPIFQGFEPVKQWLAEQKPDVTFY  
VYN DHMTSFF-  
EHYSHFALGVGEEYSPADEGGGQRDLPPIKGDP ELAKHIAECLVADEFDLAYWQGMGLDFGAFS  
PLSVLLPHEHGWPCRIVPLQCGVLQ  
HPIPKARRFWNFRSLRRAIQSYP-  
RDIKVAIAGTGGLSHQVHGERAGFNNTTEWDMEFMERLANDPESLLGATVTDLAKKGGWEGAE  
VVMWLLMRGALS-  
----PEVKTLHQSYFLP-SMTAIATMLFEDQGD

>PcaA  
AEGGNIYFLAKIGATHGLSFQQMAGSM--TGMSEAAYRDMMIGGGRRP---EGNRLKDLD  
GWTPPEPGEKAETVRQ  
>3MQU  
ALTDALYFIXGSFVEAGLEPGLFEIVQQANXAK-----LGPDGQPIFRESQKVXKPD  
GWLPPPEPQLEAEVVRQ
